# Supplementary material for: The Anti-Endometriotic Effect of Cyperi Rhizoma Extract, Inhibiting Cell Adhesion and the Expression of Pain-Related Factors through Akt and NF-kB Pathways
Source: MDPI journal article supplement (doi:10.3390/medicina58030335), 2022-02-23
Supplement: s1 [file s1]

## Materials and Methods

### *Preparation of the $\alpha$ -cyperone*

$\alpha$ -Cyperone was isolated from the Cyperi Rhizoma and identified by silica gel column chromatography, high-performance liquid chromatography (HPLC), and nuclear magnetic resonance (NMR), as described in previous studies [1-4]. The chemical structure of  $\alpha$ -cyperone was identified by spectroscopic data and specific optical rotation and by comparison with published data.

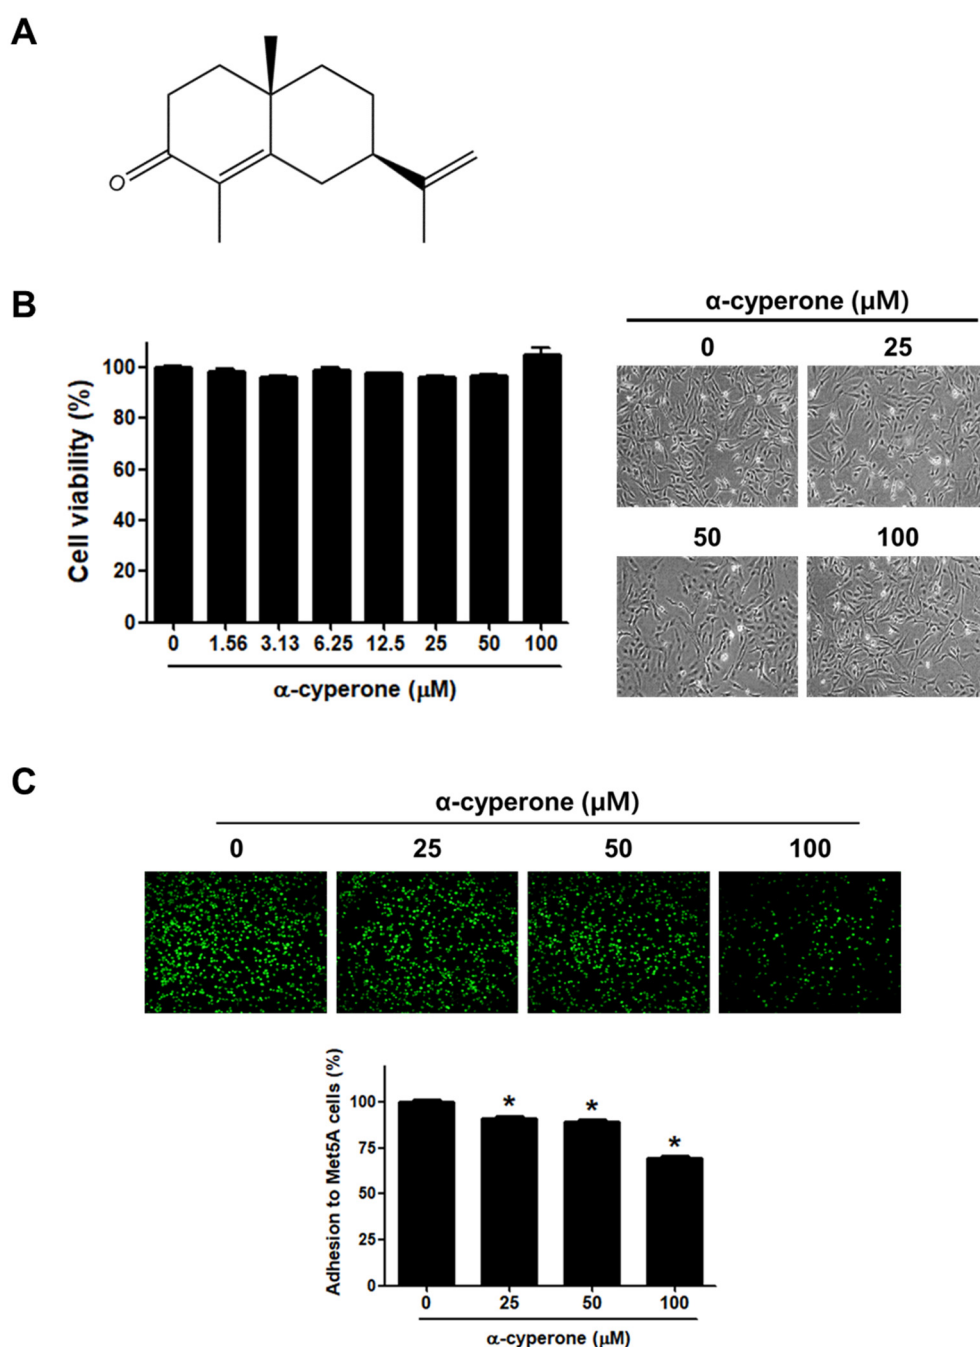

**Figure S1. Effect of  $\alpha$ -cyperone on endometriotic cell adhesion to mesothelial cells.** (A) Structure of  $\alpha$ -cyperone. The chemical structure of  $\alpha$ -cyperone was identified by spectroscopic data and specific optical rotation and by comparison with published data. (B) Cell viability was determined by MTT assay. Representative images show the cell morphology of 12Z cells treated with  $\alpha$ -cyperone at indicated concentration (25, 50, and 100  $\mu$ M) for 24 h. (C) Human endometriotic cells (12Z) were treated with  $\alpha$ -cyperone at indicated concentration (25, 50, and 100  $\mu$ M) for 24 h. The 12Z cells labelled with CellTrackerTM (10  $\mu$ M) were cultured on Met5A cell layers in 96-well plate for 1h. The total fluorescence in each well was measured by fluorescence microphotography. Results are the combined data (mean  $\pm$  S.D.) from three independent experiments. \* $P < 0.05$  compared with control group.

## References

1. Kim, S.J., Kim, H.J., Kim, H.J., Jang, Y.P., Oh, M.S., Jang, D.S. New patchoulane-type sesquiterpenes from the rhizomes of *Cyperus rotundus*. *Bull Korean Chem Soc* **2012**, *33*, 3115-3118.
2. Kim, S.J., Ryu, B., Kim, H.-Y., Yang, Y.-I., Ham, J., Choi, J.-H., Jang, D.S. Sesquiterpenes from the rhizomes of *Cyperus rotundus* and their potential to inhibit LPS-induced nitric oxide production. *Bull Korean Chem Soc* **2013**, *34*, 2207-2210.
3. Ryu, B., Kim, H.M., Lee, J.-S., Cho, Y.J., Oh, M.S., Choi, J.-H., Jang, D.S. Sesquiterpenes from rhizomes of *Cyperus rotundus* with cytotoxic activities on human cancer cells in vitro. *Helvetica Chimica Acta* **2015**, *98*, 1372-1380.
4. Sim, Y.; Choi, J.G.; Gu, P.S.; Ryu, B.; Kim, J.H.; Kang, I.; Jang, D.S.; Oh, M.S. Identification of Neuroactive Constituents of the Ethyl Acetate Fraction from Cyperi Rhizoma Using Bioactivity-Guided Fractionation. *Biomolecules & therapeutics* **2016**, *24*, 438-445, doi:10.4062/biomolther.2016.091.
